# Supplementary material for: Clean hydrogen potential for carbon-neutral copper mining
Source: Royal Society of Chemistry journal article supplement (doi:10.1039/d4ee02823f), 2024-01-01
Supplement: d4ee02823f1.xlsx [file d4ee02823f1.xlsx]

## Sheet: SI Table 1
Name: Production and value of central to the energy sector materials
Year 2022	Global production (million t)	US production (million t)	US Estimated Value, billion US$
Copper	22	1.3	11
Iron & Steel (pig iron + raw steel)	3200	103	132
Aluminum (primary)	69	0.86	2.9
Cement	4100	95	14.6
Source:	USGS Mineral Commodities Summaries 2023

## Sheet: SI Table 2
Name: Projected need for copper by clean energy technologies and the respective projected emissions from increased copper need
	2020	2035												2040												2050
Category	Historical	BaU (NREL1)	95% electrification by 2050 (NREL2)	95% electrification by 2035 (NREL3)	AEO 2022 Reference case (EIA1)	High economic growth (EIA2)	Low economic growth (EIA3)	High oil price (EIA4)	Low oil price (EIA5)	High oil and gas supply (EIA6)	Low oil and gas supply (EIA7)	High renewables cost (EIA8)	Low renewables cost (EIA9)	BaU (NREL1)	95% electrification by 2050 (NREL2)	95% electrification by 2035 (NREL3)	AEO 2022 Reference case (EIA1)	High economic growth (EIA2)	Low economic growth (EIA3)	High oil price (EIA4)	Low oil price (EIA5)	High oil and gas supply (EIA6)	Low oil and gas supply (EIA7)	High renewables cost (EIA8)	Low renewables cost (EIA9)	BaU (NREL1)	95% electrification by 2050 (NREL2)	95% electrification by 2035 (NREL3)	AEO 2022 Reference case (EIA1)	High economic growth (EIA2)	Low economic growth (EIA3)	High oil price (EIA4)	Low oil price (EIA5)	High oil and gas supply (EIA6)	Low oil and gas supply (EIA7)	High renewables cost (EIA8)	Low renewables cost (EIA9)
Power lines, km	3.07743e+06	6.19535e+06	9.11682e+06	1.34997e+07	6.08197e+06	6.17915e+06	6.05768e+06	6.83513e+06	6.04148e+06	5.30452e+06	7.44252e+06	5.19924e+06	6.989e+06	6.91612e+06	1.22186e+07	1.63767e+07	6.67316e+06	7.10238e+06	6.43831e+06	7.71787e+06	6.61647e+06	5.75803e+06	8.36575e+06	5.51508e+06	8.13899e+06	8.98933e+06	1.98592e+07	2.10353e+07	8.0742e+06	8924544	7.44252e+06	9.24039e+06	7.83125e+06	6.989e+06	1.04633e+07	6.4788e+06	1.14351e+07
Transmission power lines, km	307743	619535	911682	1.34997e+06	608197	617915	605768	683513	604148	530452	744252	519924	698900	691612	1.22186e+06	1.63767e+06	667316	710238	643831	771787	661647	575803	836575	551508	813899	898933	1.98592e+06	2.10353e+06	807420	892454	744252	924039	783125	698900	1.04633e+06	647880	1.14351e+06
Distribution power lines, km	2.76969e+06	5.57582e+06	8.20513e+06	1.21497e+07	5.47377e+06	5.56124e+06	5.45191e+06	6.15162e+06	5.43733e+06	4.77406e+06	6.69827e+06	4.67931e+06	6.2901e+06	6.22451e+06	1.09968e+07	1.4739e+07	6.00585e+06	6.39214e+06	5.79447e+06	6.94608e+06	5.95483e+06	5.18223e+06	7.52917e+06	4.96357e+06	7.32509e+06	8.0904e+06	1.78733e+07	1.89318e+07	7.26678e+06	8.03209e+06	6.69827e+06	8.31635e+06	7.04812e+06	6.2901e+06	9.41693e+06	5.83092e+06	1.02916e+07
EVs, million vehicles	2				28	32	25	39	26	28	28	28	28				36	42	31	50	32	35	36	35	36				48	62	42	67	42	46	49	47	48
Solar, GW	76	317	592	840	366	372	374	446	361	306	470	257	459	372	813	979	432	471	419	535	425	359	540	291	550	539	1235	1232	579	655	520	688	552	488	715	381	806
Nuclear, GW	97	91	91	91	82	86	79	79	84	56	93	86	70	91	91	91	81	86	79	79	84	54	93	86	65	89	89	89	81	86	80	78	82	51	94	87	41
Wind, GW	125	233	291	541	204	206	198	217	203	196	243	206	229	259	394	668	211	217	199	232	206	200	260	211	264	304	763	899	229	240	217	245	224	221	299	239	352
Hydropower, GW	80	80	79.7417	79.9334	80	80	80	80	80	80	80	80	80	80	79.7531	80.1904	80	80	80	80	80	80	80	80	80	80	80.2125	80.4305	80	80	80	80	80	80	80	80	80
Battery storage, GW	2	44	72	115	19	19	17	22	18	17	33	13	25	52	131	204	20	23	18	27	22	18	60	13	46	98	285	297	28	41	22	50	29	23	104	13	133
Total	380	765	1125.74	1666.93	751	763	748	844	746	655	919	642	863	854	1508.75	2022.19	824	877	795	953	817	711	1033	681	1005	1110	2452.21	2597.43	997	1102	919	1141	967	863	1292	800	1412
Share of Transmission lines in the grid	0.1
Share of Distribution lines in the grid	0.9
			ref
Length of US electricity grid	9.817e+06	km	https://infrastructurereportcard.org/wp-content/uploads/2020/12/Energy-2021.pdf
Capacity of the US electricity grid	1212.2	GW	https://www.eia.gov/electricity/annual/html/epa_04_03.html
Length per Capacity of the US electricity grid	8098.5	km/GW
	Wind turbine, onshore	Solar PV	Hydro	Nuclear	Battery storage, ton per GW	EV, ton per MILLION vehicle	Power Line, ton/km
copper content, ton/GW	4100	3800	1100	1500	200	61000	1
		2035												2040												2050
Category	2020	NREL1	NREL2	NREL3	EIA1	EIA2	EIA3	EIA4	EIA5	EIA6	EIA7	EIA8	EIA9	NREL1	NREL2	NREL3	EIA1	EIA2	EIA3	EIA4	EIA5	EIA6	EIA7	EIA8	EIA9	NREL1	NREL2	NREL3	EIA1	EIA2	EIA3	EIA4	EIA5	EIA6	EIA7	EIA8	EIA9
Transmission lines	0.307743	0.619535	0.911682	1.34997	0.608197	0.617915	0.605768	0.683513	0.604148	0.530452	0.744252	0.519924	0.6989	0.691612	1.22186	1.63767	0.667316	0.710238	0.643831	0.771787	0.661647	0.575803	0.836575	0.551508	0.813899	0.898933	1.98592	2.10353	0.80742	0.892454	0.744252	0.924039	0.783125	0.6989	1.04633	0.64788	1.14351
Distribution lines	2.76969	5.57582	8.20513	12.1497	5.47377	5.56124	5.45191	6.15162	5.43733	4.77406	6.69827	4.67931	6.2901	6.22451	10.9968	14.739	6.00585	6.39214	5.79447	6.94608	5.95483	5.18223	7.52917	4.96357	7.32509	8.0904	17.8733	18.9318	7.26678	8.03209	6.69827	8.31635	7.04812	6.2901	9.41693	5.83092	10.2916
EVs	0.122	0	0	0	1.708	1.952	1.525	2.379	1.586	1.708	1.708	1.708	1.708	0	0	0	2.196	2.562	1.891	3.05	1.952	2.135	2.196	2.135	2.196	0	0	0	2.928	3.782	2.562	4.087	2.562	2.806	2.989	2.867	2.928
Solar	0.2888	1.2046	2.2496	3.192	1.3908	1.4136	1.4212	1.6948	1.3718	1.1628	1.786	0.9766	1.7442	1.4136	3.0894	3.7202	1.6416	1.7898	1.5922	2.033	1.615	1.3642	2.052	1.1058	2.09	2.0482	4.693	4.6816	2.2002	2.489	1.976	2.6144	2.0976	1.8544	2.717	1.4478	3.0628
Wind	0.5125	0.9553	1.1931	2.2181	0.8364	0.8446	0.8118	0.8897	0.8323	0.8036	0.9963	0.8446	0.9389	1.0619	1.6154	2.7388	0.8651	0.8897	0.8159	0.9512	0.8446	0.82	1.066	0.8651	1.0824	1.2464	3.1283	3.6859	0.9389	0.984	0.8897	1.0045	0.9184	0.9061	1.2259	0.9799	1.4432
Nuclear	0.1455	0.1365	0.1365	0.1365	0.123	0.129	0.1185	0.1185	0.126	0.084	0.1395	0.129	0.105	0.1365	0.1365	0.1365	0.1215	0.129	0.1185	0.1185	0.126	0.081	0.1395	0.129	0.0975	0.1335	0.1335	0.1335	0.1215	0.129	0.12	0.117	0.123	0.0765	0.141	0.1305	0.0615
Hydropower	0.088	0.088	0.0877158	0.0879267	0.088	0.088	0.088	0.088	0.088	0.088	0.088	0.088	0.088	0.088	0.0877284	0.0882094	0.088	0.088	0.088	0.088	0.088	0.088	0.088	0.088	0.088	0.088	0.0882337	0.0884735	0.088	0.088	0.088	0.088	0.088	0.088	0.088	0.088	0.088
Battery storage	0.0004	0.0088	0.0144	0.023	0.0038	0.0038	0.0034	0.0044	0.0036	0.0034	0.0066	0.0026	0.005	0.0104	0.0262	0.0408	0.004	0.0046	0.0036	0.0054	0.0044	0.0036	0.012	0.0026	0.0092	0.0196	0.057	0.0594	0.0056	0.0082	0.0044	0.01	0.0058	0.0046	0.0208	0.0026	0.0266
Other	0.2339	0.2333	0.238616	0.247427	0.2148	0.2208	0.2099	0.2109	0.2176	0.1754	0.2341	0.2196	0.198	0.2349	0.250428	0.265509	0.2135	0.2216	0.2101	0.2119	0.2184	0.1726	0.2395	0.2196	0.1947	0.2411	0.278734	0.281374	0.2151	0.2252	0.2124	0.215	0.2168	0.1691	0.2498	0.2211	0.1761
Total	4.46853	8.82185	13.0367	19.4046	10.4468	10.831	10.2355	12.2204	10.2668	9.32972	12.401	9.16764	11.7761	9.86142	17.4243	23.3667	11.8029	12.7871	11.1576	14.1759	11.4649	10.4224	14.1587	10.0602	13.8968	12.7661	28.238	29.9655	14.5715	16.6299	13.295	17.3763	13.8428	12.8937	17.8948	12.2157	19.2213
Label	x	2x	3x	4.6x	2.4x	2.5x	2.4x	2.9x	2.4x	2.2x	2.9x	2.1x	2.7x	2.3x	4.1x	5.5x	2.8x	3x	2.6x	3.3x	2.7x	2.5x	3.3x	2.4x	3.4x	3x	7x	7x	3.4x	4x	3x	4x	3x	3x	4x	2.8x	4.5x
Stats Cu need, Mt	2035		2040		2050
Transmission lines	0.519924	1.34997	0.551508	1.63767	0.64788	2.10353
Distribution lines	4.67931	12.1497	4.96357	14.739	5.83092	18.9318
EVs	1.525	2.379	1.891	3.05	2.562	4.087
Solar	0.9766	3.192	1.1058	3.7202	1.4478	4.693
Wind	0.8036	2.2181	0.8159	2.7388	0.8897	3.6859
Nuclear	0.084	0.1395	0.081	0.1395	0.0615	0.141
Hydropower	0.0877158	0.088	0.0877284	0.0882094	0.088	0.0884735
Battery storage	0.0026	0.023	0.0026	0.0408	0.0026	0.0594
Other	0.1754	0.247427	0.1726	0.265509	0.1691	0.281374
CO2 emissions, Mt
CI = 2 t CO2/t Cu
		2035												2040												2050
Category	2020	NREL1	NREL2	NREL3	EIA1	EIA2	EIA3	EIA4	EIA5	EIA6	EIA7	EIA8	EIA9	NREL1	NREL2	NREL3	EIA1	EIA2	EIA3	EIA4	EIA5	EIA6	EIA7	EIA8	EIA9	NREL1	NREL2	NREL3	EIA1	EIA2	EIA3	EIA4	EIA5	EIA6	EIA7	EIA8	EIA9
Transmission lines	0.615486	1.23907	1.82336	2.69993	1.21639	1.23583	1.21154	1.36703	1.2083	1.0609	1.4885	1.03985	1.3978	1.38322	2.44373	3.27534	1.33463	1.42048	1.28766	1.54357	1.32329	1.15161	1.67315	1.10302	1.6278	1.79787	3.97185	4.20706	1.61484	1.78491	1.4885	1.84808	1.56625	1.3978	2.09265	1.29576	2.28702
Distribution lines	5.53937	11.1516	16.4103	24.2994	10.9475	11.1225	10.9038	12.3032	10.8747	9.54813	13.3965	9.35862	12.5802	12.449	21.9935	29.4781	12.0117	12.7843	11.5889	13.8922	11.9097	10.3645	15.0583	9.92714	14.6502	16.1808	35.7466	37.8635	14.5336	16.0642	13.3965	16.6327	14.0962	12.5802	18.8339	11.6618	20.5831
EVs	0.244	0	0	0	3.416	3.904	3.05	4.758	3.172	3.416	3.416	3.416	3.416	0	0	0	4.392	5.124	3.782	6.1	3.904	4.27	4.392	4.27	4.392	0	0	0	5.856	7.564	5.124	8.174	5.124	5.612	5.978	5.734	5.856
Solar	0.5776	2.4092	4.4992	6.384	2.7816	2.8272	2.8424	3.3896	2.7436	2.3256	3.572	1.9532	3.4884	2.8272	6.1788	7.4404	3.2832	3.5796	3.1844	4.066	3.23	2.7284	4.104	2.2116	4.18	4.0964	9.386	9.3632	4.4004	4.978	3.952	5.2288	4.1952	3.7088	5.434	2.8956	6.1256
Wind	1.025	1.9106	2.3862	4.4362	1.6728	1.6892	1.6236	1.7794	1.6646	1.6072	1.9926	1.6892	1.8778	2.1238	3.2308	5.4776	1.7302	1.7794	1.6318	1.9024	1.6892	1.64	2.132	1.7302	2.1648	2.4928	6.2566	7.3718	1.8778	1.968	1.7794	2.009	1.8368	1.8122	2.4518	1.9598	2.8864
Nuclear	0.291	0.273	0.273	0.273	0.246	0.258	0.237	0.237	0.252	0.168	0.279	0.258	0.21	0.273	0.273	0.273	0.243	0.258	0.237	0.237	0.252	0.162	0.279	0.258	0.195	0.267	0.267	0.267	0.243	0.258	0.24	0.234	0.246	0.153	0.282	0.261	0.123
Hydropower	0.176	0.176	0.175432	0.175853	0.176	0.176	0.176	0.176	0.176	0.176	0.176	0.176	0.176	0.176	0.175457	0.176419	0.176	0.176	0.176	0.176	0.176	0.176	0.176	0.176	0.176	0.176	0.176467	0.176947	0.176	0.176	0.176	0.176	0.176	0.176	0.176	0.176	0.176
Battery storage	0.0008	0.0176	0.0288	0.046	0.0076	0.0076	0.0068	0.0088	0.0072	0.0068	0.0132	0.0052	0.01	0.0208	0.0524	0.0816	0.008	0.0092	0.0072	0.0108	0.0088	0.0072	0.024	0.0052	0.0184	0.0392	0.114	0.1188	0.0112	0.0164	0.0088	0.02	0.0116	0.0092	0.0416	0.0052	0.0532
Other	0.4678	0.4666	0.477232	0.494853	0.4296	0.4416	0.4198	0.4218	0.4352	0.3508	0.4682	0.4392	0.396	0.4698	0.500857	0.531019	0.427	0.4432	0.4202	0.4238	0.4368	0.3452	0.479	0.4392	0.3894	0.4822	0.557467	0.562747	0.4302	0.4504	0.4248	0.43	0.4336	0.3382	0.4996	0.4422	0.3522
Total	8.93706	17.6437	26.0735	38.8092	20.8935	21.6619	20.471	24.4409	20.5336	18.6594	24.802	18.3353	23.5522	19.7228	34.8486	46.7334	23.6057	25.5742	22.3152	28.3517	22.9297	20.8449	28.3175	20.1204	27.7936	25.5323	56.476	59.9311	29.143	33.2599	26.59	34.7526	27.6857	25.7874	35.7895	24.4314	38.4426
CI = 6 t CO2/t Cu
Transmission lines	1.84646	3.71721	5.47009	8.09979	3.64918	3.70749	3.63461	4.10108	3.62489	3.18271	4.46551	3.11954	4.1934	4.14967	7.33118	9.82602	4.0039	4.26143	3.86298	4.63072	3.96988	3.45482	5.01945	3.30905	4.88339	5.3936	11.9155	12.6212	4.84452	5.35473	4.46551	5.54423	4.69875	4.1934	6.27796	3.88728	6.86105
Distribution lines	16.6181	33.4549	49.2308	72.8981	32.8426	33.3674	32.7115	36.9097	32.624	28.6444	40.1896	28.0759	37.7406	37.347	65.9806	88.4342	36.0351	38.3529	34.7668	41.6765	35.729	31.0934	45.175	29.7814	43.9505	48.5424	107.24	113.591	43.6007	48.1925	40.1896	49.8981	42.2887	37.7406	56.5016	34.9855	61.7494
EVs	0.732	0	0	0	10.248	11.712	9.15	14.274	9.516	10.248	10.248	10.248	10.248	0	0	0	13.176	15.372	11.346	18.3	11.712	12.81	13.176	12.81	13.176	0	0	0	17.568	22.692	15.372	24.522	15.372	16.836	17.934	17.202	17.568
Solar	1.7328	7.2276	13.4976	19.152	8.3448	8.4816	8.5272	10.1688	8.2308	6.9768	10.716	5.8596	10.4652	8.4816	18.5364	22.3212	9.8496	10.7388	9.5532	12.198	9.69	8.1852	12.312	6.6348	12.54	12.2892	28.158	28.0896	13.2012	14.934	11.856	15.6864	12.5856	11.1264	16.302	8.6868	18.3768
Wind	3.075	5.7318	7.1586	13.3086	5.0184	5.0676	4.8708	5.3382	4.9938	4.8216	5.9778	5.0676	5.6334	6.3714	9.6924	16.4328	5.1906	5.3382	4.8954	5.7072	5.0676	4.92	6.396	5.1906	6.4944	7.4784	18.7698	22.1154	5.6334	5.904	5.3382	6.027	5.5104	5.4366	7.3554	5.8794	8.6592
Nuclear	0.873	0.819	0.819	0.819	0.738	0.774	0.711	0.711	0.756	0.504	0.837	0.774	0.63	0.819	0.819	0.819	0.729	0.774	0.711	0.711	0.756	0.486	0.837	0.774	0.585	0.801	0.801	0.801	0.729	0.774	0.72	0.702	0.738	0.459	0.846	0.783	0.369
Hydropower	0.528	0.528	0.526295	0.52756	0.528	0.528	0.528	0.528	0.528	0.528	0.528	0.528	0.528	0.528	0.52637	0.529257	0.528	0.528	0.528	0.528	0.528	0.528	0.528	0.528	0.528	0.528	0.529402	0.530841	0.528	0.528	0.528	0.528	0.528	0.528	0.528	0.528	0.528
Battery storage	0.0024	0.0528	0.0864	0.138	0.0228	0.0228	0.0204	0.0264	0.0216	0.0204	0.0396	0.0156	0.03	0.0624	0.1572	0.2448	0.024	0.0276	0.0216	0.0324	0.0264	0.0216	0.072	0.0156	0.0552	0.1176	0.342	0.3564	0.0336	0.0492	0.0264	0.06	0.0348	0.0276	0.1248	0.0156	0.1596
Other	1.4034	1.3998	1.4317	1.48456	1.2888	1.3248	1.2594	1.2654	1.3056	1.0524	1.4046	1.3176	1.188	1.4094	1.50257	1.59306	1.281	1.3296	1.2606	1.2714	1.3104	1.0356	1.437	1.3176	1.1682	1.4466	1.6724	1.68824	1.2906	1.3512	1.2744	1.29	1.3008	1.0146	1.4988	1.3266	1.0566
Total projected CO2 emissions, Mt	26.8112	52.9311	78.2205	116.428	62.6806	64.9857	61.4129	73.3226	61.6007	55.9783	74.4061	55.0058	70.6566	59.1685	104.546	140.2	70.8172	76.7225	66.9456	85.0552	68.7892	62.5346	84.9525	60.3611	83.3807	76.5968	169.428	179.793	87.429	99.7797	79.7701	104.258	83.0571	77.3622	107.369	73.2942	115.328

## Sheet: SI Table 3
Name: Reductant and heating fuel requirements for anode furnace (AF)
				Cu	methane (CH4)	coke (C)	hydrogen (H2)
		Molar Mass	g/mol	63.5	16	12	2
		Lower Heating Value (LHV)	MJ/kg	-	55	32.8	120
		Total amount of reductant + preheating fuel in AF	CH4	C	H2
			34.2316	50.4377	18.118
Reductant amount
	CH4	C	H2	Unit
mol reductant per mol Cu	0.125	0.25	0.5	mol/mol Cu
mol reductant per t Cu	1968.5	3937.01	7874.02	mol/t Cu
kg reductant per t Cu	31.4961	47.2441	15.748	kg/t Cu
Reductant preheating
	CH4	C	H2
energy for the preheat, MJ/t Cu	150.456	104.752	284.4
heating fuel amount, kg/t Cu	2.73556	3.19364	2.37
Matte preheating
	CH4	C	H2
energy for the preheat, MJ/t Cu	No need to preheat; the matte is at 1200°C from the converting stage. This temperature is maintained by the exothermic nature of the reduction reactions
heating fuel amount, kg/t Cu
Air preheating
	CH4	C	H2
energy for the preheat, MJ/t Cu	Negligible amount of energy
heating fuel amount, kg/t Cu

## Sheet: SI Table 3.1
Name: Energy requirement to heat methane reductant for anode furnace (AF)
T,°K	Cp, J/K*mol
300	35.708		Cp at T=300K, J/mol CH4	7227.9
350	37.874
400	40.5
450	43.374
500	46.342				Energy needed to heat CH4, MJ/t Cu	150.456
600	52.227
700	57.794
800	62.932
900	67.601
1000	71.795
1100	75.529
1200	78.833
1300	81.744
1400	84.305
1500	86.556		Cp at T=1500K, J/mol CH4	83659.5

## Sheet: SI Table 3.2
Name: Energy requirement to heat coke reductant for anode furnace (AF)
T,°K	Cp, J/K*mol
300	8.581		Cp at T=300K, J/mol C	1454.22
350	10.241
400	11.817
450	13.289
500	14.623				Energy needed to heat C, MJ	104.752
600	16.844
700	18.537
800	19.827
900	20.824
1000	21.61
1100	22.244
1200	22.766
1300	23.204
1400	23.578
1500	23.904		Cp at T=1500K, J/mol C	28061.1

## Sheet: SI Table 3.3
Name: Energy requirement to heat hydrogen reductant for anode furnace (AF)
T,°K	Cp, J/K*mol
300	28.849		Cp at T=300K, J/mol H2	8714.7
350	29.081
400	29.181
450	29.229
500	29.26				Energy needed to heat H2, MJ/t Cu	284.4
600	29.327
700	29.441
800	29.624
900	29.881
1000	30.205
1100	30.581
1200	30.992
1300	31.423
1400	31.861
1500	32.298		Cp at T=1500K, J/mol H2	44833.5

## Sheet: SI Table 3.4
Name: Energy requirement to heat Cu matte for anode furnace (AF)
T,°K	Cp, J/K*mol
300	62.664
400	67.688		Cp at T=1200K, J/mol Cu2O	59583.6
500	70.922				Energy needed to heat the Cu2O, MJ/t Cu	2.88911
600	73.448
700	75.645
800	77.666
900	79.493
1000	81.245
1100	83.385
1200	86.11
1300	89.173
1400	92.489
1500	95.987		Cp at T=1500K, J/mol Cu2O	83659.5

## Sheet: SI Table 3.5
Name: Energy requirement to heat air in anode furnace (AF)
T,°K	Cp, J/K*mol
300	0.718		Cp at T=300K	200.16
350	0.721
400	0.726				Energy needed to heat the air, MJ/t Cu	0.029498
450	0.733
500	0.742
550	0.753
600	0.764
650	0.776
700	0.788
750	0.8
800	0.812
900	0.834
1000	0.855		Cp at T=1500K	1159.2
1100	0.868
1200	0.886
1300	0.903
1400	0.917
1500	0.929

## Sheet: SI Table 4
Name: Initial assumptions for feedstocks in AF
Feedstock	Emissions from production, kgCO2/kg feedstock or kWh for electrolysis; min	Emissions from production, kgCO2/kg H2; min	Emissions from production, kgCO2/kg feedstock or kWh; max	Emissions from production, kgCO2/kg H2; max	Reference					Feedstock	Emissions from production, kg CO2/kWh; min	Emissions from production, kg CO2/kWh; max
CH4	0.4	-	0.6	-	https://www.energy.gov/sites/prod/files/2019/09/f66/Life%20Cycle%20Analysis%20of%20Natural%20Gas%20Extraction%20and%20Power%20Generation%2005_29_14%20NETL.pdf					NG Grid	0.3	0.7
Coke	0.1	-	0.38	-	https://www.nrel.gov/docs/fy99osti/25119.pdf					Coal Grid	0.9	1
H2: SMR	-	4	-	12	https://greet.es.anl.gov/publication-smr_h2_2019					US 2016 Grid	0.4759	0.4759
H2: SMR + 50% CCS	-	2.5	-	7	https://www.globalccsinstitute.com/wp-content/uploads/2021/04/Circular-Carbon-Economy-series-Blue-Hydrogen.pdf					Renewable/Nuclear	0.005	0.009
H2: SMR + 90% CCS	-	1.5	-	3	https://www.globalccsinstitute.com/wp-content/uploads/2021/04/Circular-Carbon-Economy-series-Blue-Hydrogen.pdf
Electrolysis
H2: NG Grid	0.3	15	0.7	35	https://www.eia.gov/tools/faqs/faq.php?id=74&t=11#:~:text=In%202018%2C%20total%20U.S.%20electricity,of%20CO2%20emissions%20per%20kWh.
H2: Coal Grid	0.9	45	1	50	https://www.eia.gov/tools/faqs/faq.php?id=74&t=11#:~:text=In%202018%2C%20total%20U.S.%20electricity,of%20CO2%20emissions%20per%20kWh.
H2: US 2016 Grid	0.4759	23.795	0.4759	23.795	https://www.carbonfootprint.com/docs/2019_06_emissions_factors_sources_for_2019_electricity.pdf
H2: Renewable/Nuclear	0.005	0.25	0.009	0.45	https://www.democrats.senate.gov/imo/media/doc/inflation_reduction_act_of_2022.pdf
H2: AZ 2022 Grid	0.33429	16.7145	0.33429	16.7145	https://www.carbonfootprint.com/docs/2019_06_emissions_factors_sources_for_2019_electricity.pdf
Heating + Reductant use, per t Cu
CH4, kg/t Cu	34.24
Coke, kg/t Cu	50.43
H2, kg/t Cu	18.12

## Sheet: SI Table 5
Name: Emissions from AF operation
		Reductant preheat combustion	Reductant preheat production	Reductant in reaction	Reductant production	Losses Combustion	Losses Production	Total emissions	Total emissions without losses
NG	min	7.535	1.096	86.625	12.6	57.75	8.4	174.006	107.856
	max	7.535	1.644	86.625	18.9	57.75	12.6	185.054	114.704
Coke	min	11.6967	0.319	174.788	4.724	99	3.6	294.128	191.528
	max	11.6967	1.2122	174.788	17.9512	99	13.68	318.328	205.648
H2: SMR	min	0	9.48	0	63	0	32	104.48	72.48
	max	0	28.44	0	189	0	96	313.44	217.44
H2: SMR + 55%CCS	min	0	5.925	0	39.375	0	20	65.3	45.3
	max	0	16.59	0	110.25	0	56	182.84	126.84
H2: SMR + 93%CCS	min	0	3.555	0	23.625	0	12	39.18	27.18
	max	0	7.11	0	47.25	0	24	78.36	54.36
H2: 100% NG Grid	min	0	35.55	0	236.25	0	120	391.8	271.8
	max	0	82.95	0	551.25	0	280	914.2	634.2
H2: 100% Coal Grid	min	0	106.65	0	708.75	0	360	1175.4	815.4
	max	0	118.5	0	787.5	0	400	1306	906
H2: US 2016 Grid		0	56.3941	0	374.771	0	190.36	621.525	431.165
H2: 100% RE grid	min	0	0.5925	0	3.9375	0	2	6.53	4.53
	max	0	1.0665	0	7.0875	0	3.6	11.754	8.154
H2: AZ 2022 Grid		0	39.6134	0	263.253	0	133.716	436.583	302.867
Notes:
During copper reduction with methane, reaction releases 2.75 kg CO2 for each kg CH4
During copper reduction with coke, reaction releases 3.7 kg CO2 for each kg C

[truncated: 11 more sheets: SI Table 6, SI Table 7, SI Table 8, SI Table 8.1, SI Table 9, SI Table 9.1, SI Table 9.2, SI Table 9.3, SI Table 9.4, SI Table 9.5, SI Table 10]
